# Supplementary material for: Unbiased Estimate of Synonymous and Nonsynonymous Substitution Rates with Nonstationary Base Composition
Source: PubMed Central journal article supplement (PMC5850866; doi:10.1093/molbev/msx308), 2017-12-06
Supplement: msx308_supp.pdf [file msx308_supp.pdf]

# Unbiased estimate of synonymous and non-synonymous substitution rates with non-stationary base composition: supplementary material

Laurent Guéguen and Laurent Duret

## 1 Mathematics

### 1.1 Ability

Here we describe how stochastic mapping is used to compute the ability of a model for a set of sequences along a phylogenetic tree.

We denote by  $D$  a set of sequences in an alphabet  $\mathcal{A}$ , and by  $T$  a phylogenetic tree. On each site, each sequence of  $D$  is the result of a substitution process from a root sequence along the branches of  $T$ . On a given branch  $b$  of length  $t$ , this substitution process can be represented by a continuous time Markov process  $(X(\tau))_\tau$ .

We define  $\mathbb{E} = \{(a, a') \in \mathcal{A} \times \mathcal{A}; a \neq a'\}$  the set of all substitutions, and focus on a subset  $\mathbb{L}$  of events ( $\mathbb{L} \subset \mathbb{E}$ ). These events are named  $\mathbb{L}$ -events. In our case, the  $\mathbb{L}$ -events are the synonymous substitutions or the non-synonymous substitutions and  $\mathcal{A}$  is the set of codons.

$N_{\mathbb{L}}$  denotes the number of  $\mathbb{L}$ -events that occur along process  $X$ . Since  $X$  is unknown,  $N_{\mathbb{L}}$  is unknown. Substitution mapping approach is used to compute the expectation of  $N_{\mathbb{L}}$  over the distribution of  $X$ , given branch  $b$ , model  $\mathcal{M}$ , and data  $D$ , *i.e.*  $E(N_{\mathbb{L}}|b, \mathcal{M}, D)$ .

Now we define and compute the ability of a model  $\mathcal{M}'$  (with generator  $\mathcal{Q}'$ ) along this process  $X$ .

At time  $\tau$ , during a short time  $d\tau$ , we define the instantaneous **ability** of  $\mathcal{M}'$  to perform  $\mathbb{L}$ -event,  $A_{\mathbb{L}}^{\mathcal{Q}'}(\tau)$ , as the expectation - on  $X(\tau)$  - of the number of  $\mathbb{L}$ -events that would have been performed by a process following model  $\mathcal{M}'$  during  $d\tau$ :

$$\begin{aligned} A_{\mathbb{L}}^{\mathcal{Q}'}(\tau) &= \sum_{(a,a') \in \mathbb{L}} \mathcal{Q}'_{a,a'} \cdot P(X(\tau) = a) d\tau \\ &= \sum_{a \in \mathcal{A}} \mathcal{Q}'_{a,\mathbb{L}} P(X(\tau) = a) d\tau \end{aligned}$$

where  $\mathcal{Q}'_{a,\mathbb{L}} = \sum_{a' \in \mathcal{A}; (a,a') \in \mathbb{L}} \mathcal{Q}'_{a,a'}$ .

The ability  $A_{\mathbb{L}}^{\mathcal{Q}'}$  is the mean value of this sum along the process  $X$ :

$$\begin{aligned}
A_{\mathbb{L}}^{\mathcal{Q}'} &= \frac{1}{t} \int_{\tau=0}^t A_{\mathbb{L}}^{\mathcal{Q}'}(\tau) d\tau \\
&= \frac{1}{t} \int_{\tau=0}^t \sum_{a \in \mathcal{A}} \mathcal{Q}'_{a,\mathbb{L}} P(X(\tau) = a) d\tau = \frac{1}{t} \sum_{a \in \mathcal{A}} \mathcal{Q}'_{a,\mathbb{L}} \int_{\tau=0}^t P(X(\tau) = a) d\tau \\
&= \frac{1}{t} \sum_{a \in \mathcal{A}} \mathcal{Q}'_{a,\mathbb{L}} \mathcal{T}_a
\end{aligned}$$

where  $\mathcal{T}_a = \int_{\tau=0}^t P(X(\tau) = a) d\tau$  is the time spent by  $X$  in state  $a$ .

As for stochastic mapping, the expectation of  $A_{\mathbb{L}}^{\mathcal{Q}'}$  over all  $X$ ,  $E(A_{\mathbb{L}}^{\mathcal{Q}'} | b, M, D)$  can be efficiently computed. In Minin and Suchard (2008),  $t.A_{\mathbb{L}}^{\mathcal{Q}'}$  is defined as the **reward** of vector  $\mathcal{Q}'_{\mathbb{L}} = (\mathcal{Q}'_{a,\mathbb{L}})_a$ , which expectation over all scenarios given branch  $b$ , model  $M$ , and data  $D$ , can be computed in the same way as  $E(N_{\mathbb{L}} | b, M, D)$ .

## 1.2 Estimates of $dN$ and $dS$

Here, we show that the proposed estimates of  $dN$  and  $dS$ , using the ability of a neutral model, are the most likely on a branch  $b$  of a tree  $T$ , given a model  $M$  and data  $D$ .

Given a model  $M'$  with generator  $Q'$ , the log-likelihood of a process  $X$  along a branch  $b$  is:

$$LL(X|M') = \sum_{a \in \mathcal{A}} Q'_{aa} \mathcal{T}_a + \sum_{(a,a') \in \mathbb{E}} N_{aa'} \log(Q'_{aa'})$$

where  $\mathcal{T}_a$  is the time spent by  $X$  in state  $a$  and  $N_{aa'}$  is the number of substitutions from  $a$  to  $a'$  that occurred in  $X$  on branch  $b$ . And we consider the expectation on the distribution of  $X$  given  $T$ ,  $M$  and  $D$  (we remove expectation condition  $|b, M, D$  for sake of clarity):

$$\begin{aligned}
E(LL|M') &= \sum_{a \in \mathcal{A}} E(\mathcal{T}_a) \cdot Q'_{aa} + \sum_{(a,a') \in \mathbb{E}} E(N_{aa'}) \log(Q'_{aa'}) \\
&= - \sum_{(a,a') \in \mathbb{E}} E(\mathcal{T}_a) \cdot Q'_{aa'} + \sum_{(a,a') \in \mathbb{E}} E(N_{aa'}) \log(Q'_{aa'})
\end{aligned}$$

Now, we look for model  $M'$  that maximizes this likelihood. Actually, we only focus on the factors that define non-neutrality, *i.e.* the factors that discriminate synonymous substitutions from non-synonymous substitutions. We take into consideration two sets of substitutions :  $\mathbb{S}$  (resp.  $\mathbb{N}$ ) the set of synonymous (resp. non-synonymous) substitutions.  $\mathbb{S} \cup \mathbb{N} = \mathbb{E}$ .

And we consider that  $Q'$  can be written as :

$$Q'_{aa'} = \begin{cases} \alpha Q'_{aa^0} & \text{if } (a, a') \in \mathbb{S} \\ \beta Q'_{aa^0} & \text{if } (a, a') \in \mathbb{N} \end{cases}$$

where  $Q'_{aa^0}$  does not depend on the synonymous property of the substitution from  $a$  to  $a'$  (it is the "neutral" part of  $Q'$ , a part that we do not want to estimate).

Then:

$$\begin{aligned}
E(lL|M') &= -\sum_{(a,a') \in \mathbb{S}} E(\mathcal{T}_a) \alpha Q_{aa'}^0 - \sum_{(a,a') \in \mathbb{N}} E(\mathcal{T}_a) \beta Q_{aa'}^0 \\
&\quad + \sum_{(a,a') \in \mathbb{S}} E(N_{aa'}) \log(\alpha Q_{aa'}^0) + \sum_{(a,a') \in \mathbb{N}} E(N_{aa'}) \log(\beta Q_{aa'}^0) \\
&= -\alpha t.E(A_{\mathbb{S}}^0) - \beta t.E(A_{\mathbb{N}}^0) \\
&\quad + \log(\alpha).E(N_{\mathbb{S}}) + \log(\beta).E(N_{\mathbb{N}}) + \sum_{(a,a') \in \mathbb{E}} E(N_{aa'}) \log(Q_{aa'}^0)
\end{aligned}$$

with  $A^0 := A^{Q^0}$ .

Now, we look for which values of  $\alpha$  and  $\beta$   $E(lL|M')$  is maximized:

$$\begin{aligned}
\frac{\partial E(lL|M')}{\partial \alpha} &= -t.E(A_{\mathbb{S}}^0) + \frac{E(N_{\mathbb{S}})}{\alpha} = 0 \Leftrightarrow \alpha = \frac{E(N_{\mathbb{S}})}{t.E(A_{\mathbb{S}}^0)} \\
\frac{\partial E(lL|M')}{\partial \beta} &= -t.E(A_{\mathbb{N}}^0) + \frac{E(N_{\mathbb{N}})}{\beta} = 0 \Leftrightarrow \beta = \frac{E(N_{\mathbb{N}})}{t.E(A_{\mathbb{N}}^0)}
\end{aligned}$$

Finally, given the fixed neutral part  $Q'^0$  (and given  $T, \mathcal{M}, D$ ), the most-likely model on branch  $b$  is:

$$Q'_{aa'} = \begin{cases} \frac{E(N_{\mathbb{S}})}{t.E(A_{\mathbb{S}}^0)} Q_{aa'}^0 & \text{if } (a, a') \in \mathbb{S} \\ \frac{E(N_{\mathbb{N}})}{t.E(A_{\mathbb{N}}^0)} Q_{aa'}^0 & \text{if } (a, a') \in \mathbb{N} \end{cases}$$

and the most likely estimator of  $\omega$  is  $\frac{E(N_{\mathbb{N}})}{E(A_{\mathbb{N}}^0)} \frac{E(A_{\mathbb{S}}^0)}{E(N_{\mathbb{S}})}$ .

$dN$  and  $dS$  are usually defined as the (non-)synonymous numbers of substitutions **per (non-)synonymous nucleotide**. In order to fit with this definition, since  $Q'$  is normalized to perform one substitution **per codon** and **per unit of time** on a sequence at equilibrium, the computed estimates have to be divided per 3 and multiplied by the length of the branch.

## References

Minin, V. and Suchard, M. 2008. Fast, accurate and simulation-free stochastic mapping. *Phil. Trans. Roy. Soc. B*, 363: 3985–3995.

## 2 Figures

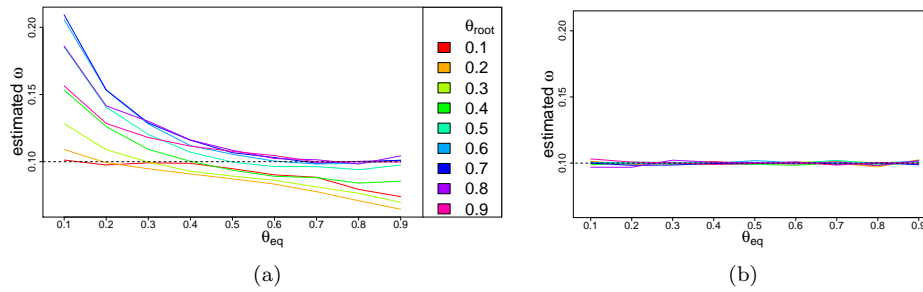

Figure S1: **Estimates of  $\omega = 0.1$**  with (a) a stationary model and (b) a non-stationary model, on simulated data with changing G+C content.  $\theta_{\text{root}}$ : G+C frequency in the root sequence.  $\theta_{\text{eq}}$ : G+C equilibrium frequency of the simulation model.

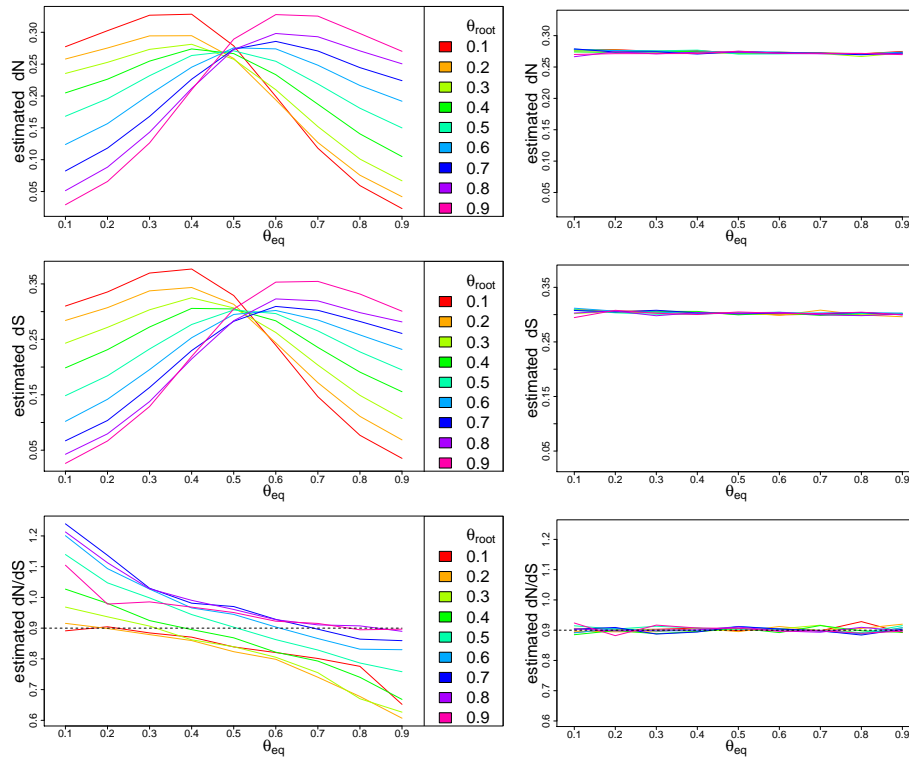

Figure S2: **Estimates of  $dN$ ,  $dS$  and  $\frac{dN}{dS}$**  with a stationary model (left) and non-stationary model (right), on simulated data with changing G+C content and  $\omega = 0.9$ .  $\theta_{\text{root}}$ : G+C frequency in the root sequence.  $\theta_{\text{eq}}$ : G+C equilibrium frequency of the simulation model.

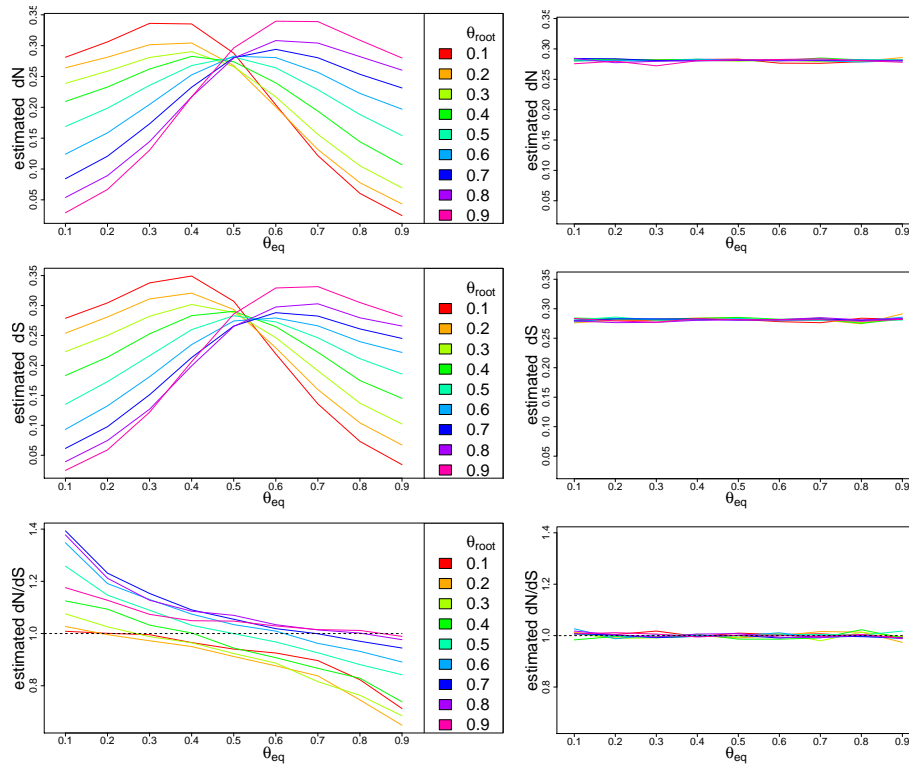

Figure S3: **Estimates of  $dN$ ,  $dS$  and  $\frac{dN}{dS}$**  with a stationary model (left) and non-stationary model (right), on simulated data with changing G+C content and  $\omega = 1$ .  $\theta_{\text{root}}$ : G+C frequency in the root sequence.  $\theta_{\text{eq}}$ : G+C equilibrium frequency of the simulation model.

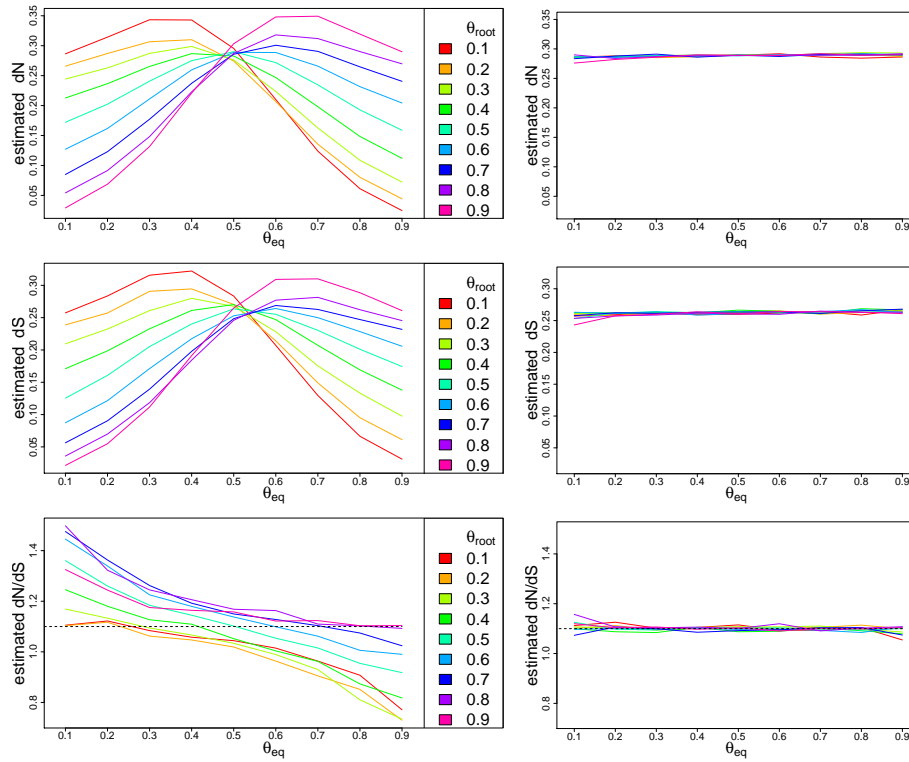

Figure S4: **Estimates of  $dN$ ,  $dS$  and  $\frac{dN}{dS}$**  with a stationary model (left) and non-stationary model (right), on simulated data with changing G+C content and  $\omega = 1.1$ .  $\theta_{\text{root}}$ : G+C frequency in the root sequence.  $\theta_{\text{eq}}$ : G+C equilibrium frequency of the simulation model.

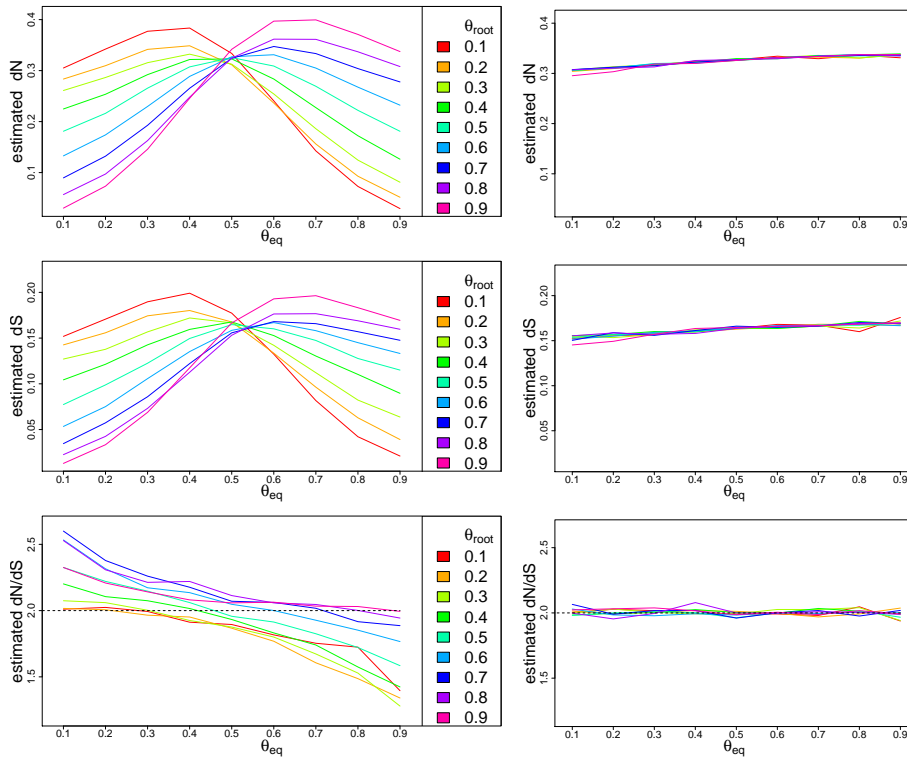

Figure S5: **Estimates of  $dN$ ,  $dS$  and  $\frac{dN}{dS}$**  with a stationary model (left) and non-stationary model (right), on simulated data with changing G+C content and  $\omega = 2$ .  $\theta_{\text{root}}$ : G+C frequency in the root sequence.  $\theta_{\text{eq}}$ : G+C equilibrium frequency of the simulation model.



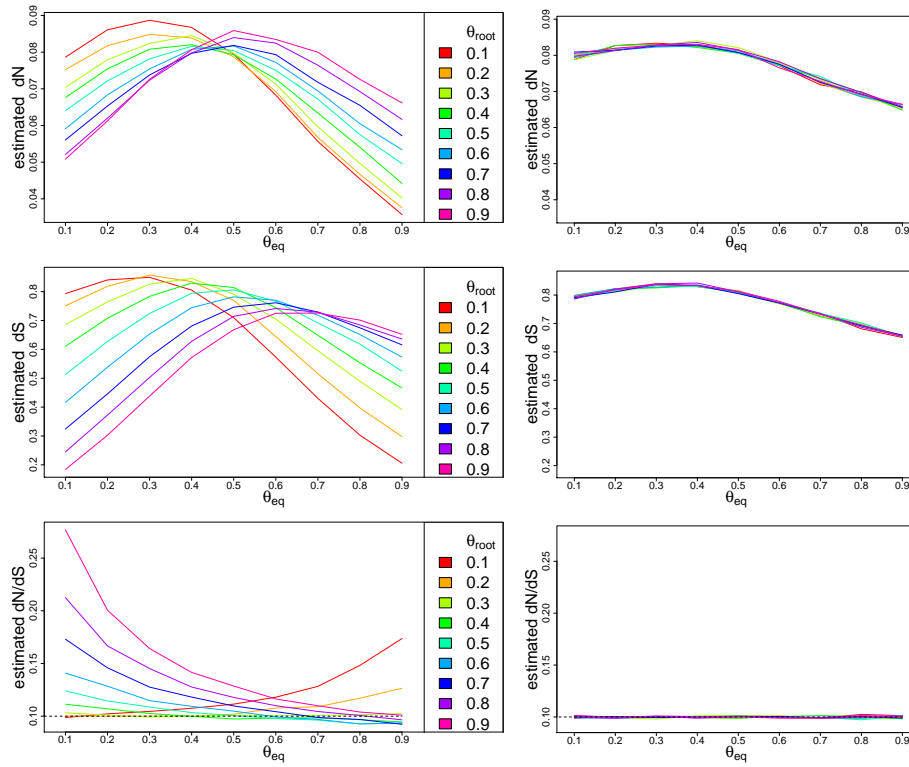

Figure S6: **Estimates of  $dN$ ,  $dS$  and  $\frac{dN}{dS}$**  with a stationary model (left) and non-stationary model (right), on simulated data with changing G+C content in codon position 1, and  $\omega = 0.1$ .  $\theta_{\text{root}}$ : G+C frequency in codon position 1 of the root sequence.  $\theta_{\text{eq}}$ : G+C equilibrium frequency in codon position 1 of the simulation model.

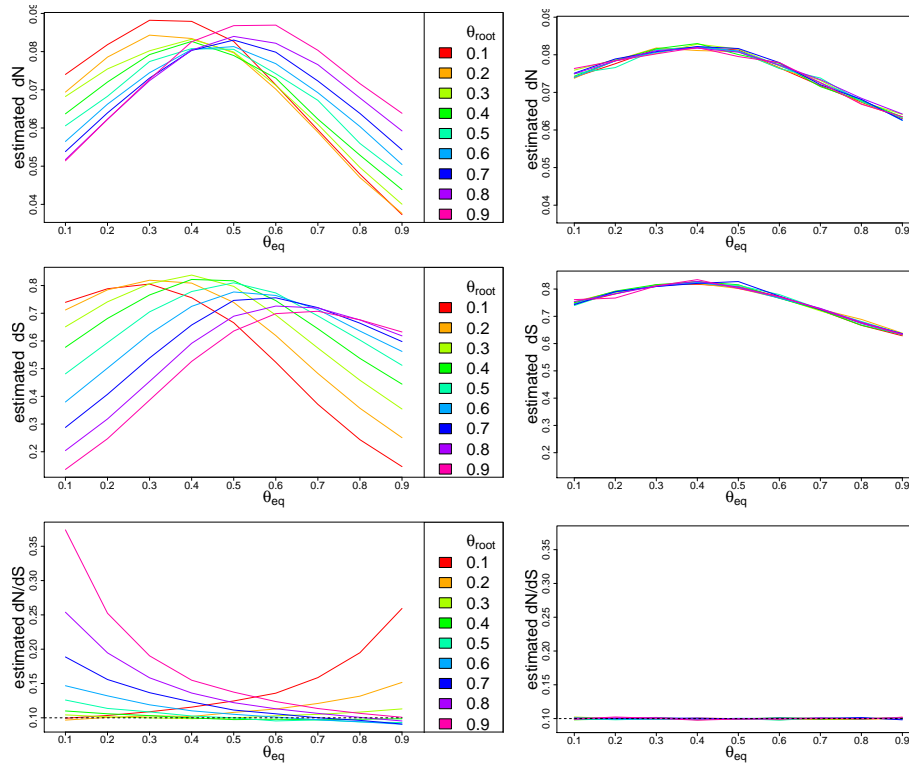

Figure S7: **Estimates of  $dN$ ,  $dS$  and  $\frac{dN}{dS}$**  with a stationary model (left) and non-stationary model (right), on simulated data with changing G+C content in codon position 2, and  $\omega = 0.1$ .  $\theta_{\text{root}}$ : G+C frequency in codon position 2 of the root sequence.  $\theta_{\text{eq}}$ : G+C equilibrium frequency in codon position 2 of the simulation model.

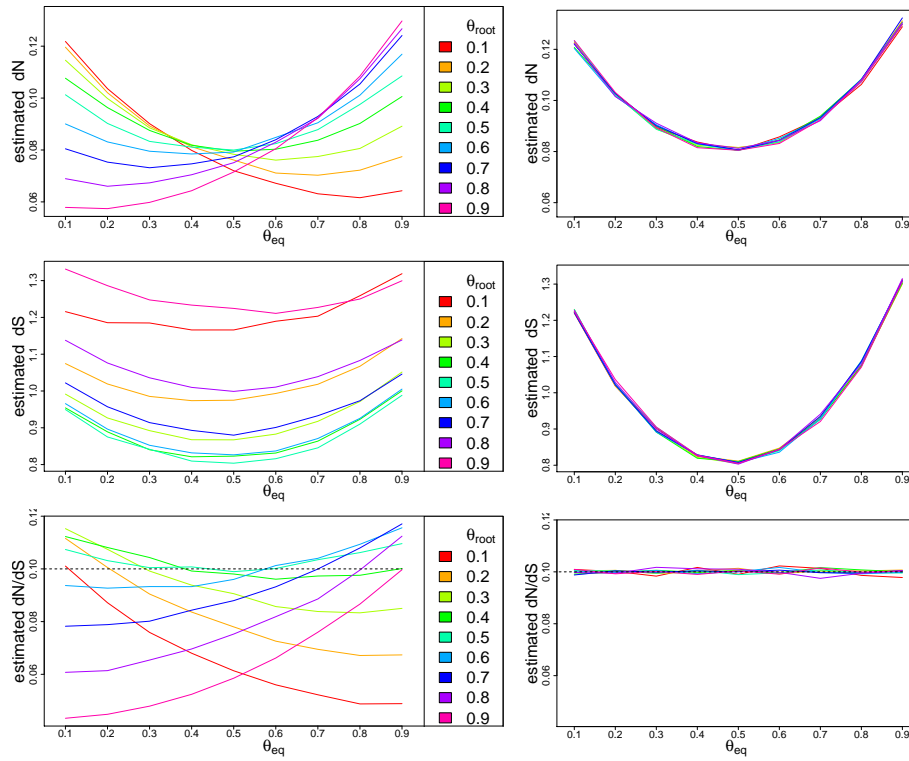

Figure S8: **Estimates of  $dN$ ,  $dS$  and  $\frac{dN}{dS}$**  with a stationary model (left) and non-stationary model (right), on simulated data with changing G+C content in codon position 3, and  $\omega = 0.1$ .  $\theta_{\text{root}}$ : G+C frequency in codon position 3 of the root sequence.  $\theta_{\text{eq}}$ : G+C equilibrium frequency in codon position 3 of the simulation model.

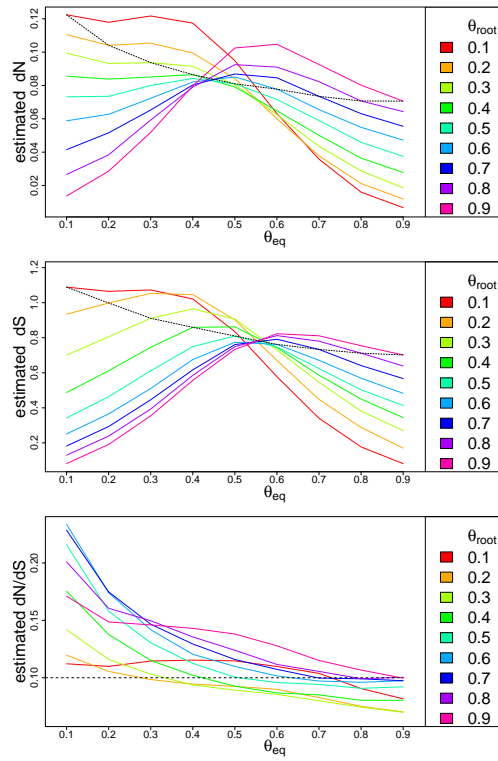

Figure S9: **Substitution rates estimated with codeml.** Sequences were simulated with changing G+C content and  $\omega = 0.1$ . From top to bottom:  $dN$ ,  $dS$  and  $\frac{dN}{dS}$ .  $\theta_{root}$ : G+C frequency in the root sequence. Dashed curve : estimates on sequences at equilibrium.  $\theta_{eq}$ : G+C equilibrium frequency of the simulation model.

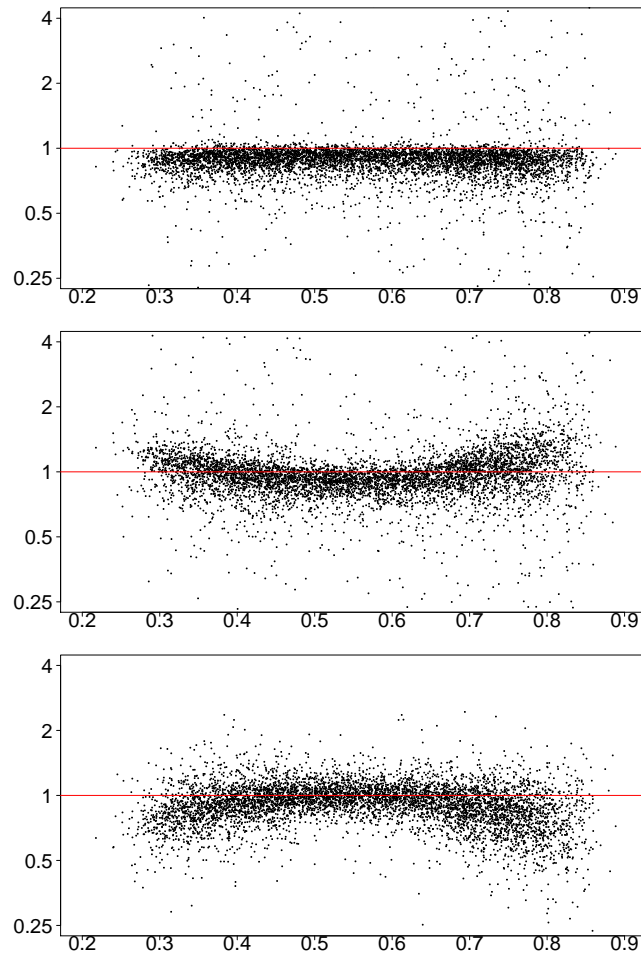

Figure S10: **log<sub>2</sub> of the ratios of estimates of  $dN$ ,  $dS$  and  $dN/dS$**  with a stationary model over the estimates with a non-stationary model, in function of human  $GC3$  content.

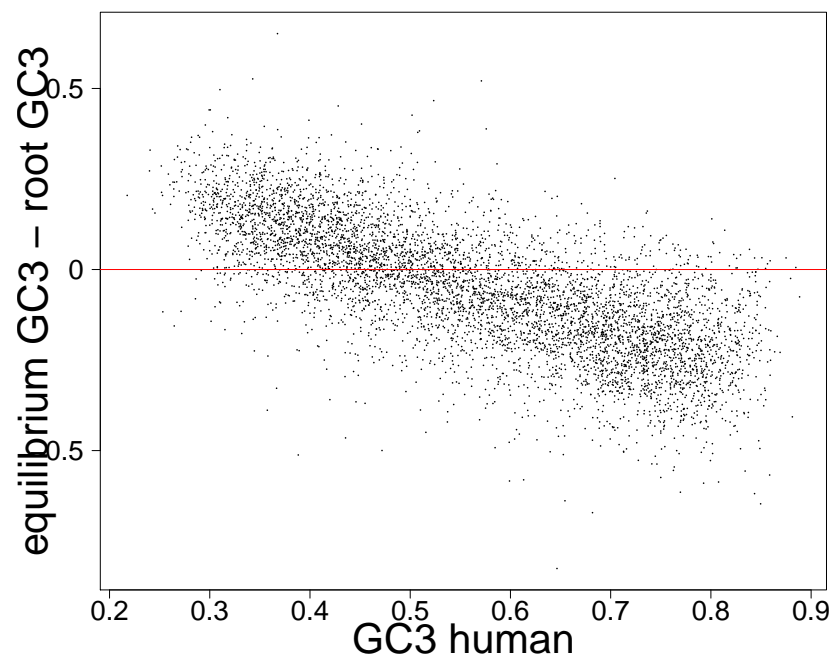

Figure S11: **Estimated difference between equilibrium GC3 in primate clade and root GC3 compared to observed human GC3.**
